# Supplementary material for: IL-17 Attenuates Degradation of ARE-mRNAs by Changing the Cooperation between AU-Binding Proteins and microRNA16
Source: PLOS journal article supplement (doi:10.1371/journal.pgen.1003747), 2013-09-26
Supplement: S4 (10.1371/journal.pgen.1003747.s004) [file journal.pgen.1003747.s004]

**A**

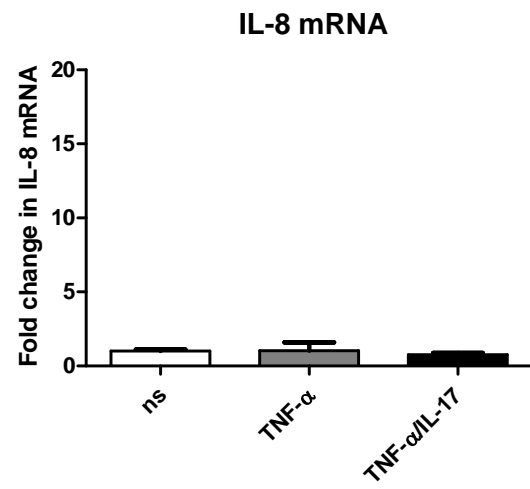

**B**

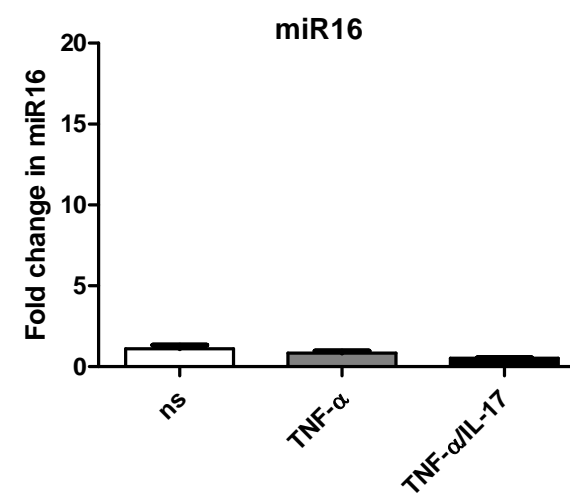

**Figure S4**
